# Supplementary material for: Ligand-mediated self-assembly of polymer-enveloped gold nanoparticle chains and networks
Source: Royal Society of Chemistry journal article supplement (doi:10.1039/c0cc03033c), 2010-01-01
Supplement: addcorr.doc [file addcorr.doc]

Addition and Correction for ChemComm:

**Ligand-mediated self-assembly of polymer-enveloped gold nanoparticle chains and networks**

Rute Fernandes, Mei Li, Erik Dujardin, Stephen Mann and Antonios G. Kanaras

*Chem. Commun.*, 2010, DOI: 10.1039/c0cc03033c

An additional acknowledgement would like to be included: The authors would like to thank Ms Dorota Bartczak for preliminary experiments and helpful discussions.

The Royal Society of Chemistry apologises for this error and any consequent inconvenience to authors and readers.

**Additions and corrections can be viewed online by accessing the original article to which they apply.**
