# Supplementary material for: Ligand-mediated self-assembly of polymer-enveloped gold nanoparticle chains and networks
Source: Royal Society of Chemistry journal article supplement (doi:10.1039/c0cc03033c), 2010-01-01
Supplement: addcorr.pdf [file addcorr.pdf]

Addition and Correction for ChemComm:

---

**Ligand-mediated self-assembly of polymer-enveloped gold nanoparticle chains and networks**

Rute Fernandes, Mei Li, Erik Dujardin, Stephen Mann and Antonios G. Kanaras

*Chem. Commun.*, 2010, DOI: 10.1039/c0cc03033c

An additional acknowledgement would like to be included: The authors would like to thank Ms Dorota Bartczak for preliminary experiments and helpful discussions.

---

The Royal Society of Chemistry apologises for this error and any consequent inconvenience to authors and readers.

**Additions and corrections can be viewed online by accessing the original article to which they apply.**

---
